# Supplementary figures and images for: Selectivity for Animal Vocalizations in the Human Auditory Cortex
Source: Oxford University Press journal article supplement (doi:10.1093/cercor/bhl167), 2007-01-24

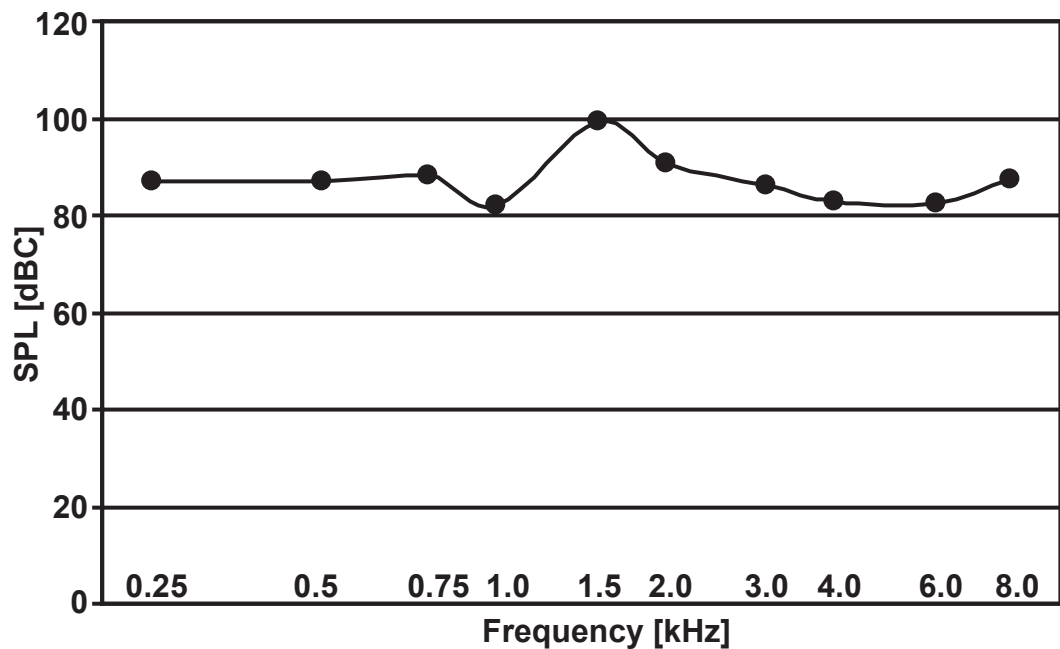

Supplement: bhl167_Supplementary_Data.zip [file bhl167_Supplementary_Data.zip]

Group data for Experiment 1

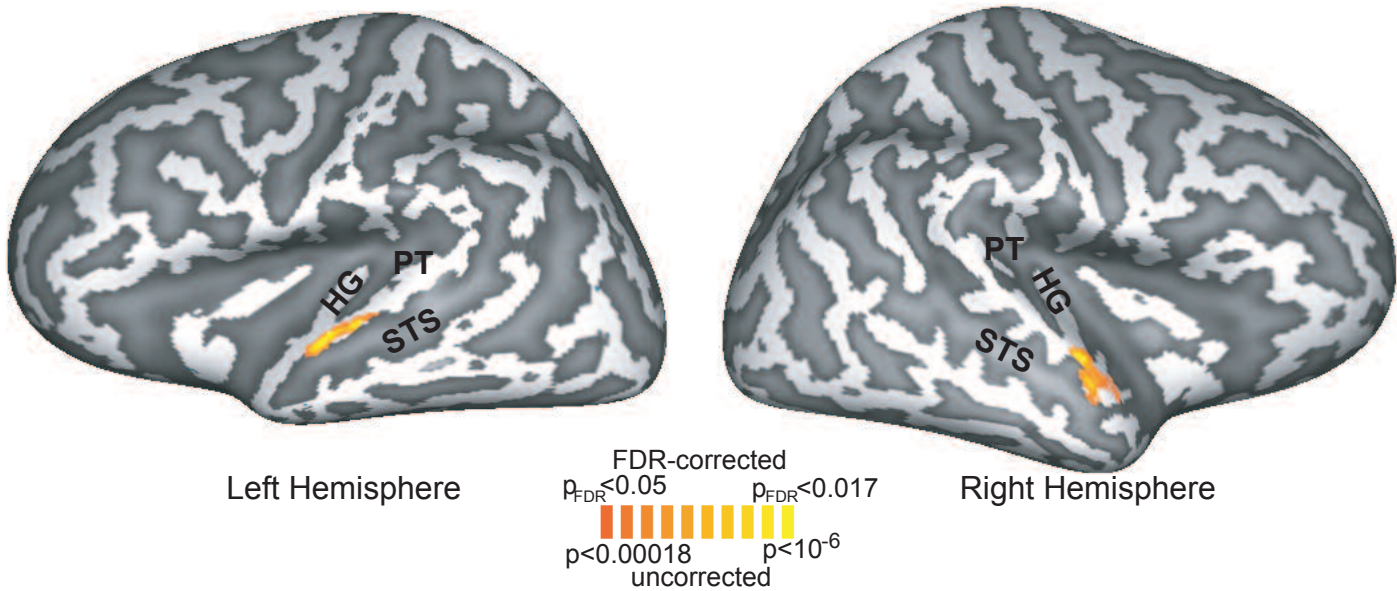

Supplement: bhl167_Supplementary_Data.zip [file bhl167_Supplementary_Data.zip]

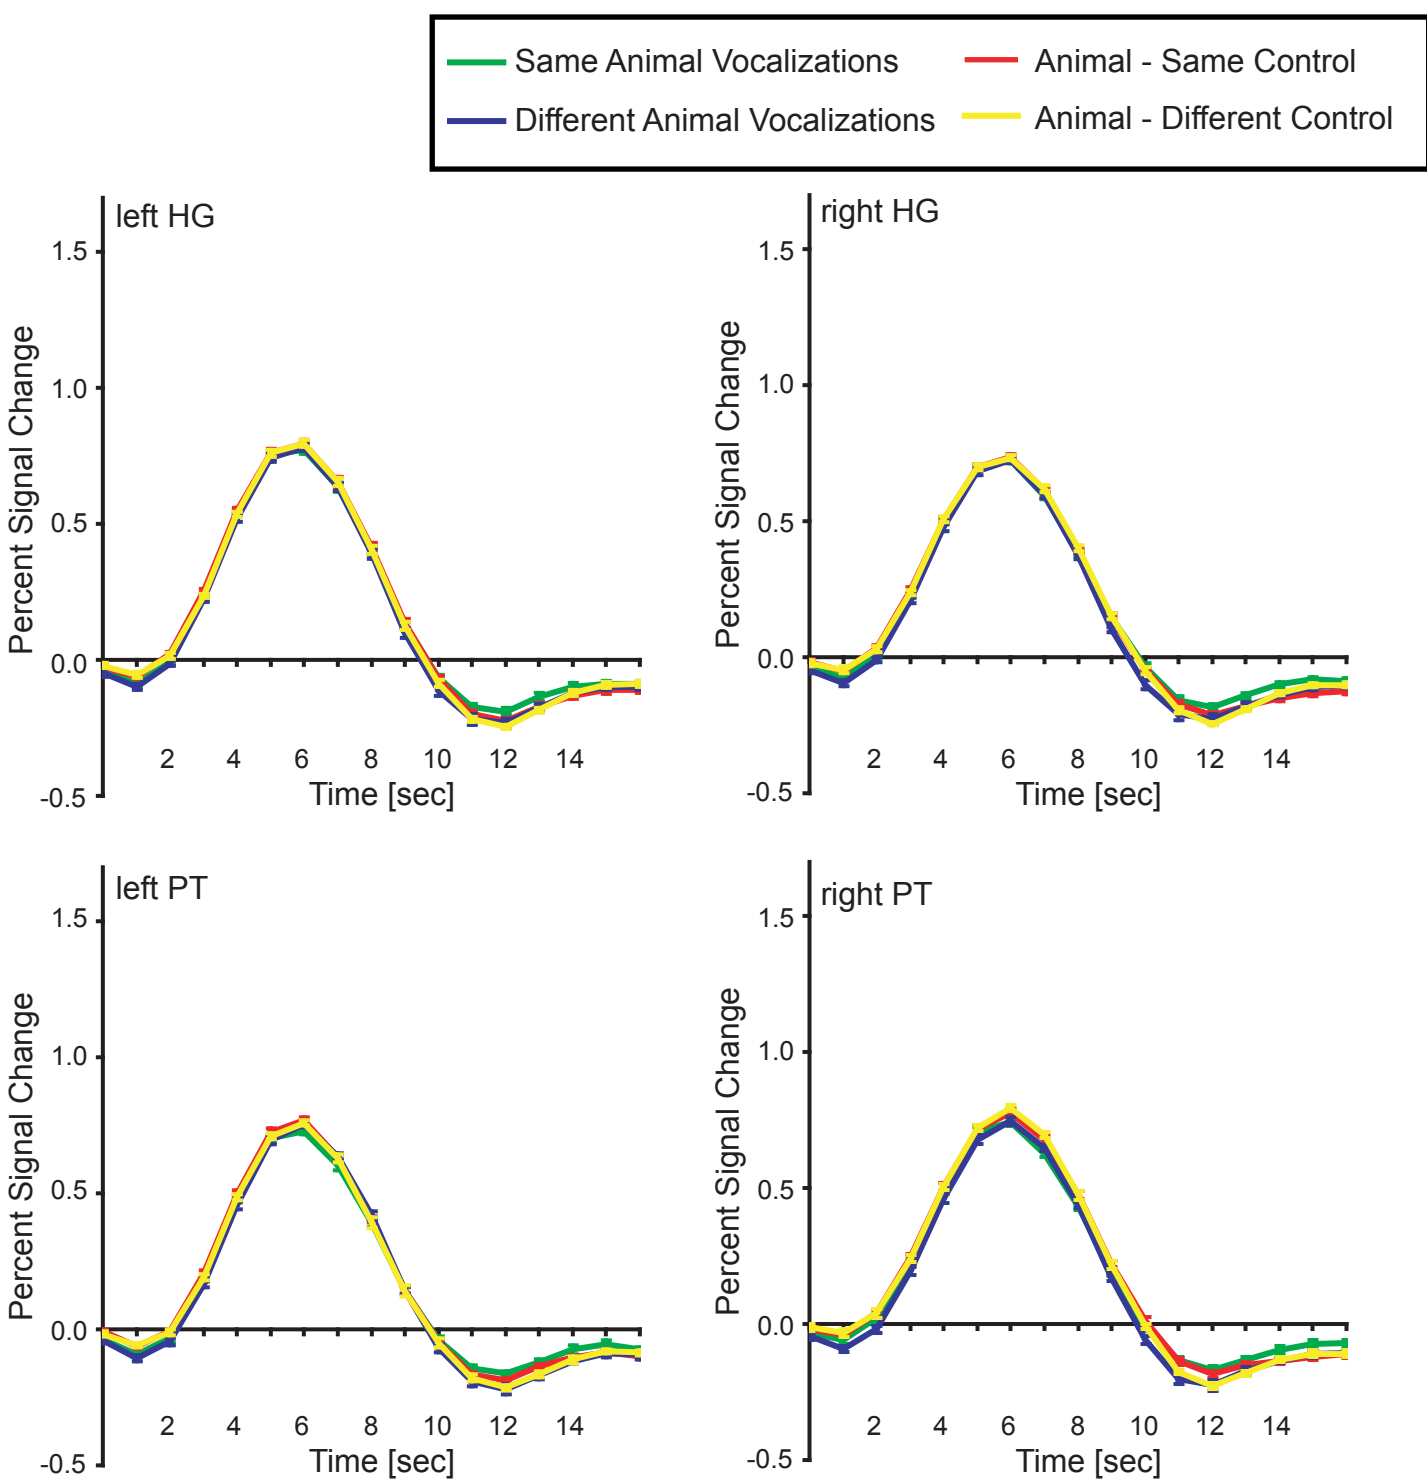

Supplement: bhl167_Supplementary_Data.zip [file bhl167_Supplementary_Data.zip]
